# Supplementary material for: Dynamin-Related Proteins Enhance Tomato Immunity by Mediating Pattern Recognition Receptor Trafficking
Source: MDPI journal article supplement (doi:10.3390/membranes12080760), 2022-08-01
Supplement: s1 [file s1]

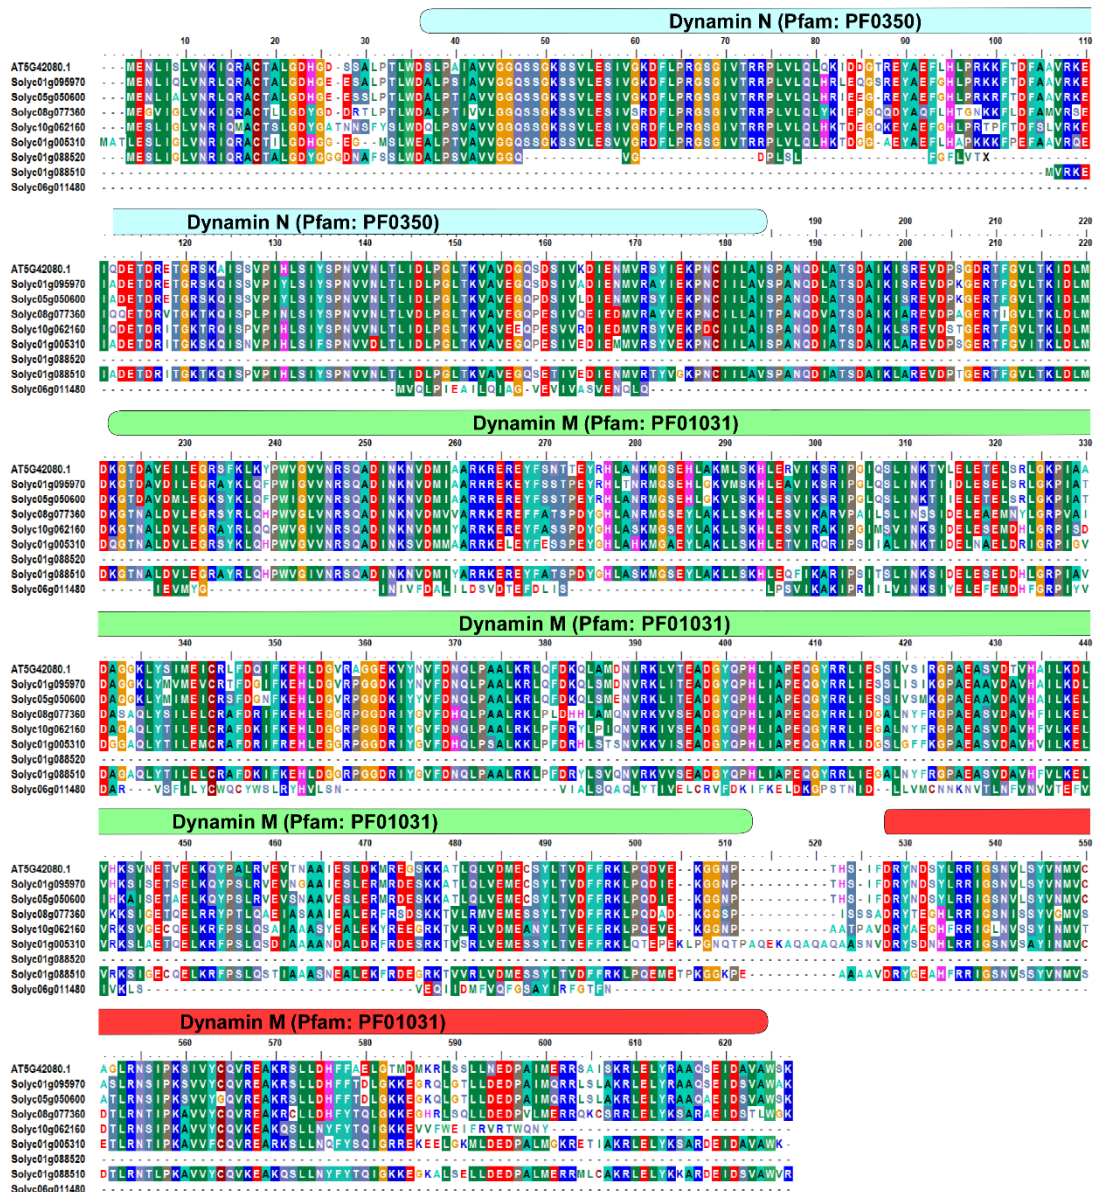

**Figure S1. Alignment of tomato DRP1 orthologues.**

ClustalW Alingment of *A. thaliana* DRP1A and tomato DRP1 orthologues: Solyc01g095970, Solyc05g050600, Solyc01g005310, Solyc08g077360, Solyc10g062160, Solyc01g088510, Solyc01g088520 and Solyc06g011480. Protein domain analysis was made using the HMMER database and shown in the scheme.

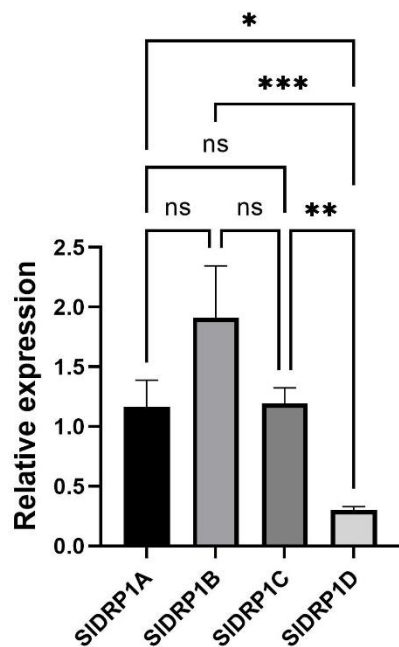

**Figure S2. SIDRP1s expression in tomato leaves.**

M82 tomato RNA was used for measuring expression level of SIDRP1s: SIDRP1A (Solyc01g095970), SIDRP1B (Solyc05g050600), SIDRP1C (Solyc01g005310) and SIDRP1D (Solyc08g077360). Relative expression was determined comparing to RLP8 housekeeping gene ( $2^{\text{Ct}}_{\text{Hkp} - \text{Ct SIDRP1X}}$ ). Three RNA biological replicates were used, each reaction was performed in triplicate. Media and SD is presented. Statistical analysis used was One-way ANOVA and post-test ad-hoc Kluskal-Wallis. \* p-value  $\leq 0.05$ , \*\* p-value  $\leq 0.01$ , \*\*\* p-value  $\leq 0.001$ .

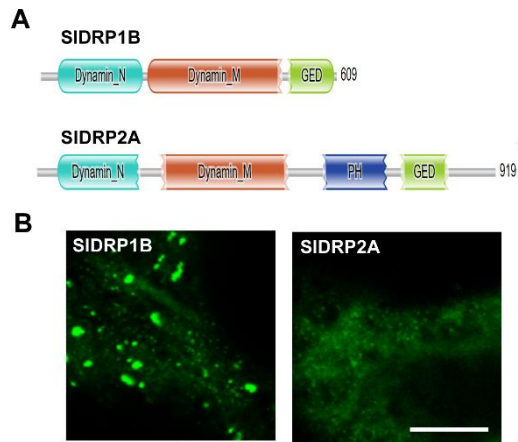

**Figure S3. SIDRP1B and SIDRP2A comparison**

**A)** Scheme of protein domains present in SIDRP1B and SIDRP2A (HMMER database). **B)** Subcellular distribution of SIDRP1B and SIDRP2A was analyzed through confocal microscopy of *N. benthamiana* epidermal cells transiently expressing SIDRP1B-GFP and SIDRP2A-GFP. Images were acquired using a Zeiss LSM 780 Confocal Microscope. Squares indicate the inset region. Scale bar 10  $\mu$ m.

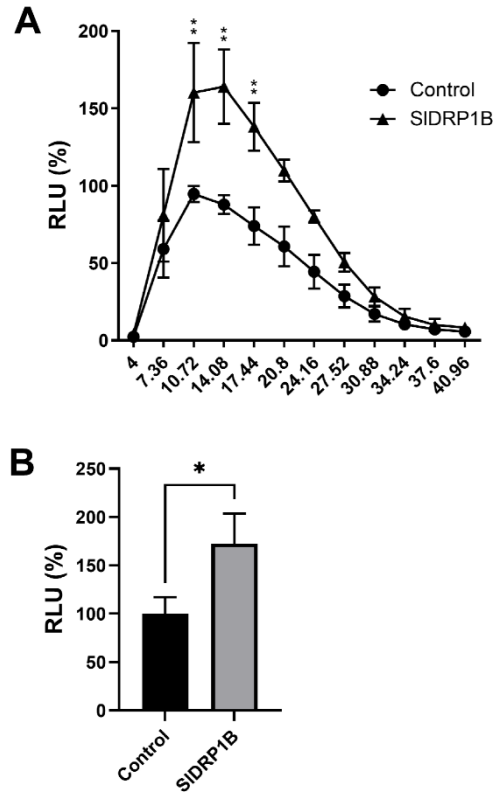

**Figure S4. Effect of overexpression of SIDRP1B on FLS2-mediated oxidative burst.** Leaf disks of *N. tabacum* transiently expressing SIDRP1B-tagged or free-tag (control) were harvested 48 h after transformation. Luminescence (RLU) was measured immediately after flg-22 application. Error bars represent the average  $\pm$  SEM of 5 independent experiments, N=12. **(A)** The average value of the control peak was defined as 100%. Time points represent the average  $\pm$  SEM. Asterisks indicate significant differences with control treatment (Two-way ANOVA, \* $P < 0.05$ , \*\* $P < 0.01$ ). **(B)** Total RLU was calculated and normalized to control. One-way ANOVA,  $P < 0.05$ .

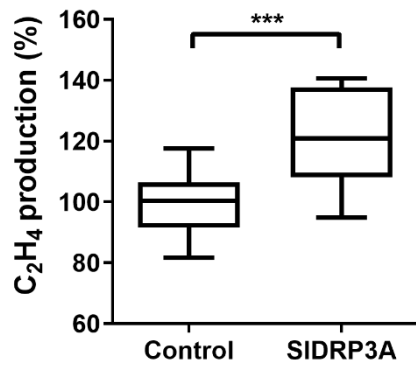

**Figure S5. Effect of overexpression of SIDRP3A on LeEIX2-mediated defense.** Leaf disks of *N. tabacum* transiently expressing SIDRP3A-tagged or free-tag (control) were harvested 48 h after transformation. Ethylene biosynthesis was measured four h after EIX application. The average value of control was defined as 100%. Boxplots represent minimum to maximum values, with boxes representing the inner-quartile ranges, whiskers representing the outer quartile ranges, and the line in the box representing the median, of 3 independent experiments, with asterisks denoting significant differences to control treatment (t-test, \*\*\*P<0.001).

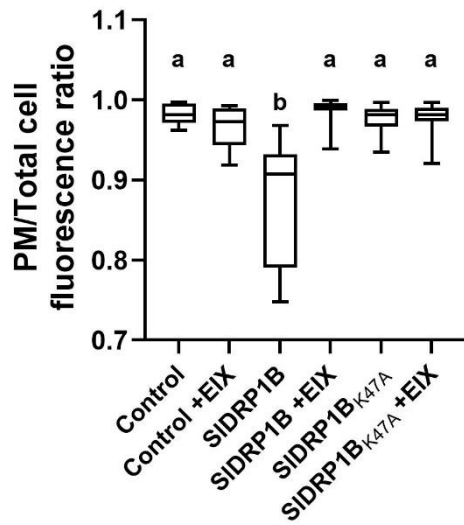

**Figure S6: LeEIX2 localization ratio at PM.**

*N. benthamiana* leaves transiently expressing LeEIX2-GFP and free mCherry (Control), SIDRP1B-mCherry and SIDRP1BK47A were treated with EIX ( $1 \mu\text{g mL}^{-1}$  tissue) or water at the petiole 40 h after transformation and visualized after 15 min. LeEIX2 fluorescence ratio at the PM/total cell fluorescence was calculated using the data set from Figure 5 (Fiji-ImageJ). Different letters indicate statistically significant differences between samples in a One-way ANOVA, with Tukey's multiple comparison test,  $P < 0.05$ .

**Table S1. Description of interacting proteins of SIDRPs.**

| Sol ID         | Description                                                                                                                 | Interpro domain(s)                              | Interaction Score |         |         |         |
|----------------|-----------------------------------------------------------------------------------------------------------------------------|-------------------------------------------------|-------------------|---------|---------|---------|
|                |                                                                                                                             |                                                 | SIDRP1A           | SIDRP1B | SIDRP1C | SIDRP2A |
| Solyc05g023750 | Arf-GAP with GTPase, ANK repeat and PH domain-containing protein 3 (AHRD V1 *-_*-AGAP3_HUMAN)                               | IPR001164 Arf GTPase activating protein         | 3,1979            | 3,1354  | -       | -       |
| Solyc07g047770 | Histidine kinase 1 (AHRD V1 ***-D9ZHC0_HYPPE)                                                                               | IPR006189 CHASE                                 | 2,3125            | 2,0000  |         |         |
| Solyc06g053760 | Syntaxin (AHRD V1 ***-Q6X9V9_HORVD)                                                                                         | IPR010989 t-SNARE                               | 2,3021            | 2,0104  | -       | -       |
| Solyc03g119010 | Pre-mRNA-splicing factor SPF27 (AHRD V1 *-_*-D3PJ34_9MAXI)                                                                  | IPR008409 Breast carcinoma amplified sequence 2 | 1,8542            | 2,1458  | -       | -       |
| Solyc02g069680 | Charged multivesicular body protein 2a (AHRD V1 ***-B6TQT7_MAIZE)                                                           | IPR005024 Snf7                                  | 1,8542            | 1,5938  | 1,7813  | 1,6354  |
| Solyc09g014450 | Unknown Protein (AHRD V1)                                                                                                   | IPR000996 Clathrin light chain                  | 1,5625            | 1,5833  | 3,6042  | 1,3229  |
| Solyc10g078790 | At5G57460 protein (Fragment, TPLATE complex subunit involved in clathrin mediated endocytosis). (AHRD V1 *-_*-B9DH18_ARATH) |                                                 | -                 | -       | 3,1458  | -       |
| Solyc01g108800 | 3-hydroxyisobutyryl-CoA hydrolase (AHRD V1 ****-D3NUG5_AZOS1)                                                               | IPR001753 Crotonase, core                       | -                 | -       | 2,3750  | -       |
| Solyc05g010460 | Unknown Protein (AHRD V1)                                                                                                   | IPR010683 Protein of unknown function DUF1262   | -                 | -       | 2,3646  | -       |
| Solyc05g010470 | Unknown Protein (AHRD V1)                                                                                                   | IPR010683 Protein of unknown function DUF1262   | -                 | -       | 2,3646  | -       |
| Solyc01g080930 | Enoyl-CoA-hydratase (AHRD V1 ***-Q9SE41_AVIMR)                                                                              | IPR001753 Crotonase, core                       | -                 | -       | 2,1354  | -       |
| Solyc05g026050 | Charged multivesicular body protein 4b (AHRD V1 ***-B6UES0_MAIZE)                                                           | IPR005024 Snf7                                  | -                 | -       | 2,0625  | -       |

**Table S2. Interactome interaction scores.**

| PTIR AC                    | Protein A                      |                        | Protein B                      |                        | Score  |
|----------------------------|--------------------------------|------------------------|--------------------------------|------------------------|--------|
|                            | Sol ID                         | Protein Name           | Sol ID                         | Protein Name           |        |
| <a href="#">PTIR258763</a> | <a href="#">Solyc06g053760</a> | <a href="#">K4C663</a> | <a href="#">Solyc06g053760</a> | <a href="#">K4C663</a> | 9,9063 |
| <a href="#">PTIR230541</a> | <a href="#">Solyc05g023750</a> | <a href="#">K4BZL4</a> | <a href="#">Solyc05g023750</a> | <a href="#">K4BZL4</a> | 9,4271 |
| <a href="#">PTIR293829</a> | <a href="#">Solyc07g047770</a> | <a href="#">K4CEY3</a> | <a href="#">Solyc07g047770</a> | <a href="#">K4CEY3</a> | 7,9375 |
| <a href="#">PTIR230920</a> | <a href="#">Solyc05g026050</a> | <a href="#">K4BZZ2</a> | <a href="#">Solyc05g026050</a> | <a href="#">K4BZZ2</a> | 7,4063 |
| <a href="#">PTIR078557</a> | <a href="#">Solyc01g108800</a> | <a href="#">K4B395</a> | <a href="#">Solyc01g108800</a> | <a href="#">K4B395</a> | 7,0000 |
| <a href="#">PTIR042343</a> | <a href="#">Solyc01g080930</a> | <a href="#">K4AXY5</a> | <a href="#">Solyc01g080930</a> | <a href="#">K4AXY5</a> | 6,9063 |
| <a href="#">PTIR042347</a> | <a href="#">Solyc01g080930</a> | <a href="#">K4AXY5</a> | <a href="#">Solyc01g108800</a> | <a href="#">K4B395</a> | 6,6667 |
| <a href="#">PTIR322002</a> | <a href="#">Solyc09g014450</a> | <a href="#">K4CRS2</a> | <a href="#">Solyc09g014450</a> | <a href="#">K4CRS2</a> | 6,4271 |
| <a href="#">PTIR055395</a> | <a href="#">Solyc01g095970</a> | <a href="#">K4AZY6</a> | <a href="#">Solyc01g095970</a> | <a href="#">K4AZY6</a> | 5,4063 |
| <a href="#">PTIR233141</a> | <a href="#">Solyc05g050600</a> | <a href="#">K4C192</a> | <a href="#">Solyc05g050600</a> | <a href="#">K4C192</a> | 5,4063 |
| <a href="#">PTIR233145</a> | <a href="#">Solyc05g050600</a> | <a href="#">K4C192</a> | <a href="#">Solyc11g039650</a> | <a href="#">K4D7U2</a> | 5,0417 |
| <a href="#">PTIR055399</a> | <a href="#">Solyc01g095970</a> | <a href="#">K4AZY6</a> | <a href="#">Solyc05g050600</a> | <a href="#">K4C192</a> | 4,9479 |
| <a href="#">PTIR055403</a> | <a href="#">Solyc01g095970</a> | <a href="#">K4AZY6</a> | <a href="#">Solyc11g039650</a> | <a href="#">K4D7U2</a> | 4,7292 |
| <a href="#">PTIR019493</a> | <a href="#">Solyc01g005310</a> | <a href="#">K4AS98</a> | <a href="#">Solyc11g039650</a> | <a href="#">K4D7U2</a> | 4,6250 |
| <a href="#">PTIR102183</a> | <a href="#">Solyc02g069680</a> | <a href="#">K4B7V0</a> | <a href="#">Solyc02g069680</a> | <a href="#">K4B7V0</a> | 3,8646 |
| <a href="#">PTIR019491</a> | <a href="#">Solyc01g005310</a> | <a href="#">K4AS98</a> | <a href="#">Solyc09g014450</a> | <a href="#">K4CRS2</a> | 3,6042 |
| <a href="#">PTIR102192</a> | <a href="#">Solyc02g069680</a> | <a href="#">K4B7V0</a> | <a href="#">Solyc05g026050</a> | <a href="#">K4BZZ2</a> | 3,5313 |
| <a href="#">PTIR055398</a> | <a href="#">Solyc01g095970</a> | <a href="#">K4AZY6</a> | <a href="#">Solyc05g023750</a> | <a href="#">K4BZL4</a> | 3,1979 |
| <a href="#">PTIR019492</a> | <a href="#">Solyc01g005310</a> | <a href="#">K4AS98</a> | <a href="#">Solyc10g078790</a> | <a href="#">K4D2C0</a> | 3,1458 |
| <a href="#">PTIR230542</a> | <a href="#">Solyc05g023750</a> | <a href="#">K4BZL4</a> | <a href="#">Solyc05g050600</a> | <a href="#">K4C192</a> | 3,1354 |
| <a href="#">PTIR322003</a> | <a href="#">Solyc09g014450</a> | <a href="#">K4CRS2</a> | <a href="#">Solyc10g078790</a> | <a href="#">K4D2C0</a> | 2,4896 |
| <a href="#">PTIR019486</a> | <a href="#">Solyc01g005310</a> | <a href="#">K4AS98</a> | <a href="#">Solyc01g108800</a> | <a href="#">K4B395</a> | 2,3750 |
| <a href="#">PTIR019488</a> | <a href="#">Solyc01g005310</a> | <a href="#">K4AS98</a> | <a href="#">Solyc05g010460</a> | <a href="#">K4BXL9</a> | 2,3646 |
| <a href="#">PTIR019489</a> | <a href="#">Solyc01g005310</a> | <a href="#">K4AS98</a> | <a href="#">Solyc05g010470</a> | <a href="#">K4BXM0</a> | 2,3646 |
| <a href="#">PTIR055401</a> | <a href="#">Solyc01g095970</a> | <a href="#">K4AZY6</a> | <a href="#">Solyc07g047770</a> | <a href="#">K4CEY3</a> | 2,3125 |
| <a href="#">PTIR055400</a> | <a href="#">Solyc01g095970</a> | <a href="#">K4AZY6</a> | <a href="#">Solyc06g053760</a> | <a href="#">K4C663</a> | 2,3021 |
| <a href="#">PTIR182495</a> | <a href="#">Solyc03g119010</a> | <a href="#">K4BM50</a> | <a href="#">Solyc05g050600</a> | <a href="#">K4C192</a> | 2,1458 |
| <a href="#">PTIR019485</a> | <a href="#">Solyc01g005310</a> | <a href="#">K4AS98</a> | <a href="#">Solyc01g080930</a> | <a href="#">K4AXY5</a> | 2,1354 |
| <a href="#">PTIR019490</a> | <a href="#">Solyc01g005310</a> | <a href="#">K4AS98</a> | <a href="#">Solyc05g026050</a> | <a href="#">K4BZZ2</a> | 2,0625 |
| <a href="#">PTIR233142</a> | <a href="#">Solyc05g050600</a> | <a href="#">K4C192</a> | <a href="#">Solyc06g053760</a> | <a href="#">K4C663</a> | 2,0104 |
| <a href="#">PTIR233143</a> | <a href="#">Solyc05g050600</a> | <a href="#">K4C192</a> | <a href="#">Solyc07g047770</a> | <a href="#">K4CEY3</a> | 2,0000 |
| <a href="#">PTIR055396</a> | <a href="#">Solyc01g095970</a> | <a href="#">K4AZY6</a> | <a href="#">Solyc02g069680</a> | <a href="#">K4B7V0</a> | 1,8542 |
| <a href="#">PTIR055397</a> | <a href="#">Solyc01g095970</a> | <a href="#">K4AZY6</a> | <a href="#">Solyc03g119010</a> | <a href="#">K4BM50</a> | 1,8542 |
| <a href="#">PTIR019487</a> | <a href="#">Solyc01g005310</a> | <a href="#">K4AS98</a> | <a href="#">Solyc02g069680</a> | <a href="#">K4B7V0</a> | 1,7813 |
| <a href="#">PTIR102211</a> | <a href="#">Solyc02g069680</a> | <a href="#">K4B7V0</a> | <a href="#">Solyc11g039650</a> | <a href="#">K4D7U2</a> | 1,6354 |
| <a href="#">PTIR102193</a> | <a href="#">Solyc02g069680</a> | <a href="#">K4B7V0</a> | <a href="#">Solyc05g050600</a> | <a href="#">K4C192</a> | 1,5938 |
| <a href="#">PTIR233144</a> | <a href="#">Solyc05g050600</a> | <a href="#">K4C192</a> | <a href="#">Solyc09g014450</a> | <a href="#">K4CRS2</a> | 1,5833 |
| <a href="#">PTIR055402</a> | <a href="#">Solyc01g095970</a> | <a href="#">K4AZY6</a> | <a href="#">Solyc09g014450</a> | <a href="#">K4CRS2</a> | 1,5625 |
| <a href="#">PTIR322004</a> | <a href="#">Solyc09g014450</a> | <a href="#">K4CRS2</a> | <a href="#">Solyc11g039650</a> | <a href="#">K4D7U2</a> | 1,3229 |



**Table S3.** Co-expressed genes list of SIDRP1B, SIDRP1C, SIDRP2A. (Attached xls)

Table S3 available in a separate excel file.

**Table S4. Gene ontology analysis.**

PANTHER GO Overrepresentation Test among 180 mapped genes from 191 SIDRP1B co-expressed genes. Table shows the first ten GO term with lowest p-Value, represented in bubble chart in Figure 1D.

| GO biological process complete                         | Count in gene set | Fold enrichment | P-value  |
|--------------------------------------------------------|-------------------|-----------------|----------|
| vesicle-mediated transport (GO:0016192)                | 25                | 12.28           | 2.18E-19 |
| localization (GO:0051179)                              | 37                | 5.36            | 9.29E-17 |
| transport (GO:0006810)                                 | 33                | 5.48            | 3.05E-15 |
| establishment of localization (GO:0051234)             | 33                | 5.35            | 5.89E-15 |
| protein metabolic process (GO:0019538)                 | 38                | 4.43            | 1.29E-14 |
| cellular protein metabolic process (GO:0044267)        | 37                | 4.54            | 1.53E-14 |
| organonitrogen compound metabolic process (GO:1901564) | 43                | 3.50            | 4.69E-13 |
| cellular localization (GO:0051641)                     | 24                | 6.68            | 4.75E-13 |
| cellular macromolecule metabolic process (GO:0044260)  | 41                | 3.63            | 6.05E-13 |
| macromolecule metabolic process (GO:0043170)           | 43                | 2.86            | 3.11E-10 |

**Table S5. List of specific real-time PCR primers used for SIDRP1s gene expression analysis.**

| Name       | Target         | Sequence                 |
|------------|----------------|--------------------------|
| qSIDRP1A_F | Solyc01g095970 | GGGCTAAGTAGACACAAACC     |
| qSIDRP1A_R | Solyc01g095970 | AGAATGACACCTATCCCTACA    |
| qSIDRP1B_F | Solyc05g050600 | GATTCAGTAGCATGGTCTAAGTAA |
| qSIDRP1B_R | Solyc05g050600 | AGAATCACTGGTCACCTATCT    |
| qSIDRP1C_F | Solyc01g005310 | GCAGTTGCTTGGAAATGATG     |
| qSIDRP1C_R | Solyc01g005310 | CGATCACTCTACTCTACTCGAT   |
| qSIDRP1D_F | Solyc08g077360 | CCTCATATGTTGGGATGGTG     |
| qSIDRP1D_R | Solyc08g077360 | TTTGCCCAGTTGCGTATAG      |
